# Supplementary material for: Impact of ozonation and biological post-treatment of municipal wastewater on microbiological quality parameters
Source: Royal Society of Chemistry journal article supplement (doi:10.1039/d1ew00312g), 2021-01-01
Supplement: d1ew00312g1.pdf [file d1ew00312g1.pdf]

## Supplementary Information

### Impact of ozonation and biological post-treatment of municipal wastewater on microbiological quality parameters

Daniel Sauter <sup>a</sup>, Claudia Stange <sup>b</sup>, Vera Schumacher <sup>a</sup>, Andreas Tiehm <sup>b</sup>, Regina Gnirss <sup>a</sup>, Thomas Wintgens <sup>\*,c,d</sup>

<sup>a</sup> Berliner Wasserbetriebe, Neue Juedenstr. 1, 10179 Berlin, Germany.

<sup>b</sup> TZW: DVGW-Technologiezentrum Wasser, Karlsruher Straße 84, 76139 Karlsruhe, Germany.

<sup>c</sup> RWTH Aachen University, Institut für Siedlungswasserwirtschaft, Mies-van-der-Rohe-Str. 1, 52074 Aachen, Germany.

<sup>d</sup> School of Life Sciences, Institute for Ecopreneurship, University of Applied Sciences and Arts Northwestern Switzerland, Hofackerstrasse 40, 4132 Muttenz, Switzerland.

\* Corresponding author. E-mail address: [wintgens@isa.rwth-aachen.de](mailto:wintgens@isa.rwth-aachen.de)

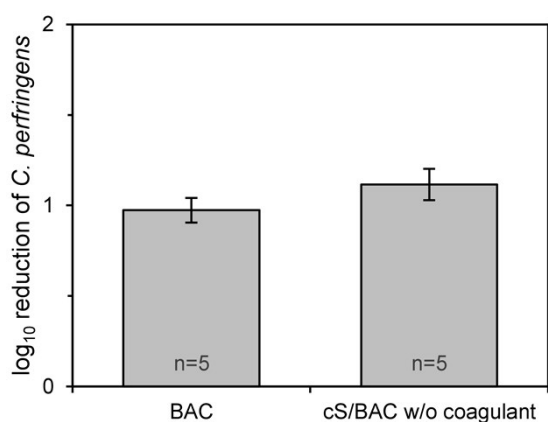

Fig. S1: Mean values with standard deviation of the log<sub>10</sub> reduction for *C. perfringens* in the BAC filter and the cS/BAC filter without coagulant dosing. n is the number of analysed samples.

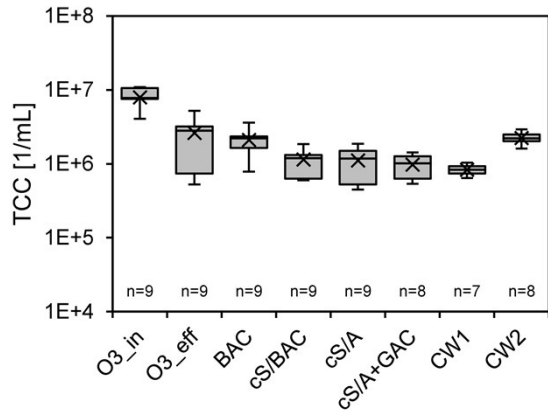

Fig. S2: Box-whisker-plot of TCC concentrations before and after ozonation and after post-treatment steps. n is the number of analysed samples.

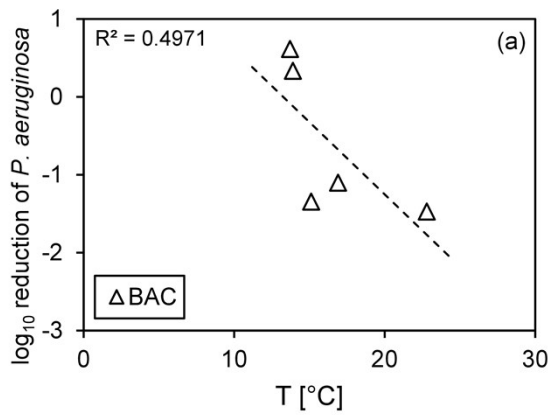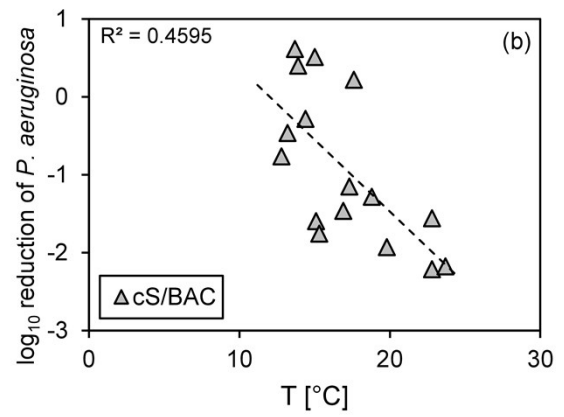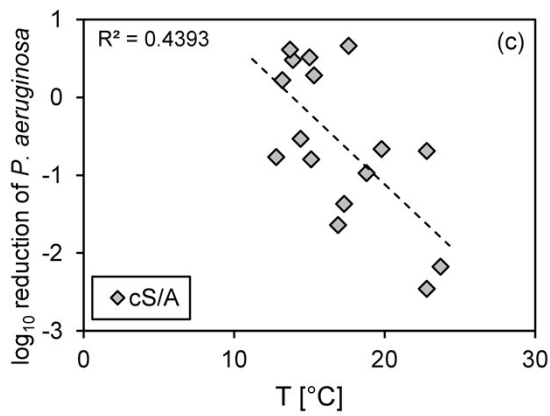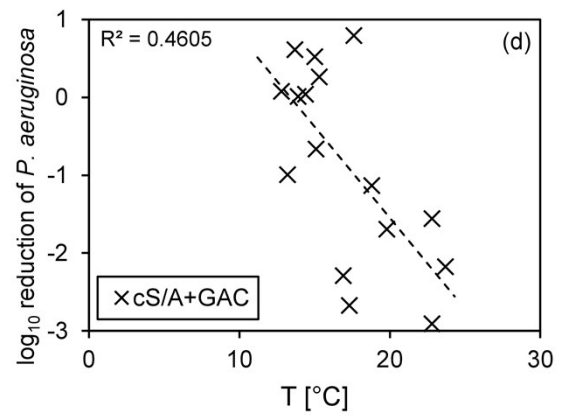

Fig. S3: Temperature dependence of the  $\log_{10}$  reduction of *P. aeruginosa* in the post-treatments (a) BAC, (b) cS/BAC, (c) cS/A and (d) cS/A+GAC.

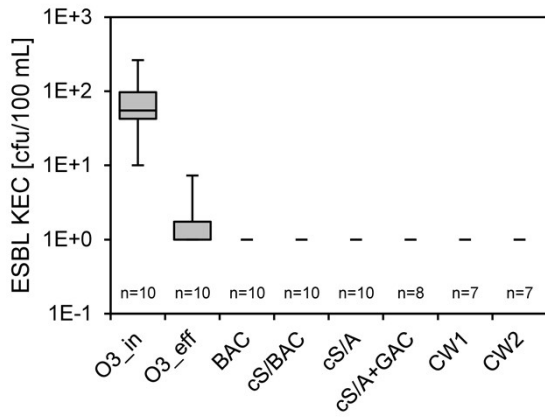

Fig. S4: Box-whisker-plot of ESBL KEC concentrations before and after ozonation and after post-treatment steps. n is the number of analysed samples.

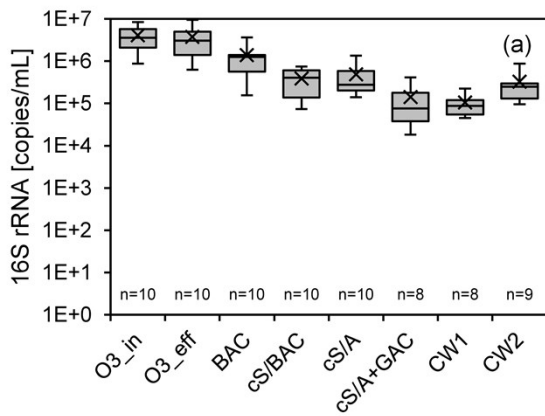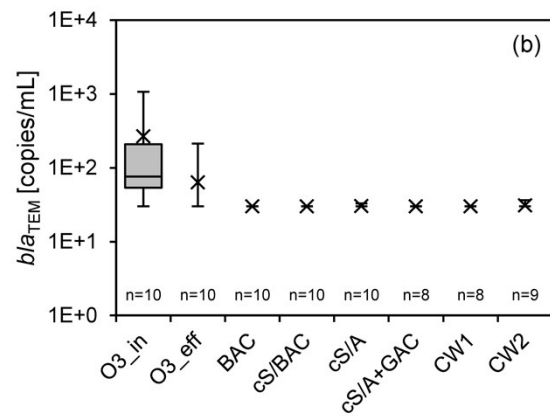

Fig. S5: Box-whisker-plots of (a) 16S rRNA and (b) *bla*<sub>TEM</sub> concentrations before and after ozonation and after post-treatment steps. n is the number of analysed samples.

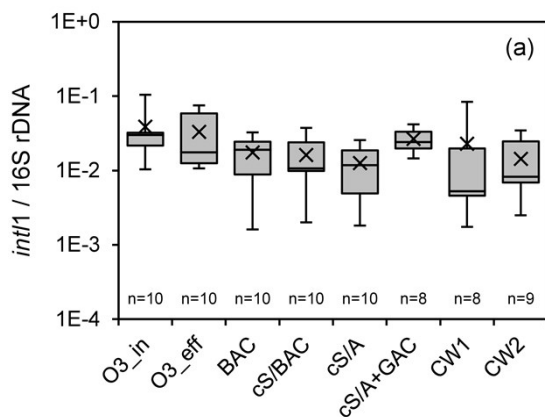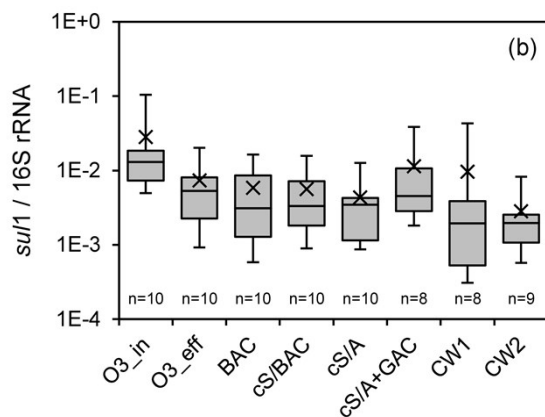

Fig. S6: Box-whisker-plots of the relative abundances (a) *int11*/16S rDNA and (b) *sul1*/16S rDNA before and after ozonation and after post-treatment steps. n is the number of analysed samples.

Table S1: Number of samples (n) and number of samples below the limit of quantification (<LOQ) for all parameters and sampling points.

| Parameter             | Number | O3_in | O3_eff | BAC | cS/BAC | cS/A | cS/A+GAC | CW1 | CW2 |
|-----------------------|--------|-------|--------|-----|--------|------|----------|-----|-----|
| <i>E. coli</i>        | n      | 32    | 32     | 21  | 33     | 33   | 30       | 14  | 14  |
|                       | <LOQ   | 0     | 2      | 0   | 8      | 7    | 13       | 12  | 8   |
| Enterococci           | n      | 32    | 32     | 21  | 33     | 33   | 30       | 14  | 14  |
|                       | <LOQ   | 0     | 1      | 10  | 30     | 26   | 25       | 11  | 8   |
| <i>C. perfringens</i> | n      | 19    | 21     | 20  | 23     | 23   | 21       | 13  | 13  |
|                       | <LOQ   | 0     | 0      | 0   | 2      | 3    | 1        | 8   | 2   |
| Somatic coliphages    | n      | 23    | 23     | 21  | 24     | 24   | 21       | 13  | 13  |
|                       | <LOQ   | 0     | 0      | 2   | 5      | 1    | 2        | 10  | 6   |
| <i>P. aeruginosa</i>  | n      | 16    | 16     | 5   | 17     | 17   | 17       |     |     |
|                       | <LOQ   | 0     | 1      | 0   | 0      | 0    | 0        |     |     |
| TCC                   | n      | 9     | 9      | 9   | 9      | 9    | 8        | 7   | 8   |
|                       | <LOQ   | 0     | 0      | 0   | 0      | 0    | 0        | 0   | 0   |
| ICC                   | n      | 9     | 9      | 9   | 9      | 9    | 8        | 7   | 8   |
|                       | <LOQ   | 0     | 0      | 0   | 0      | 0    | 0        | 0   | 0   |
| <i>int1</i>           | n      | 10    | 10     | 10  | 10     | 10   | 8        | 8   | 9   |
|                       | <LOQ   | 0     | 0      | 0   | 0      | 0    | 0        | 0   | 0   |
| <i>sul1</i>           | n      | 10    | 10     | 10  | 10     | 10   | 8        | 8   | 9   |
|                       | <LOQ   | 0     | 0      | 0   | 0      | 0    | 0        | 0   | 0   |
| 16S rRNA              | n      | 10    | 10     | 10  | 10     | 10   | 8        | 8   | 9   |
|                       | <LOQ   | 0     | 0      | 0   | 0      | 0    | 0        | 0   | 0   |
| bla <sub>TEM</sub>    | n      | 10    | 10     | 10  | 10     | 10   | 8        | 8   | 9   |
|                       | <LOQ   | 0     | 8      | 9   | 9      | 9    | 8        | 8   | 8   |
| ESBL <i>E. coli</i>   | n      | 10    | 10     | 10  | 10     | 10   | 8        | 7   | 7   |
|                       | <LOQ   | 0     | 1      | 6   | 6      | 7    | 8        | 6   | 7   |
| VRE                   | n      | 10    | 10     | 10  | 10     | 10   | 8        | 7   | 7   |
|                       | <LOQ   | 0     | 5      | 8   | 10     | 9    | 7        | 7   | 6   |
| ESBL KEC              | n      | 10    | 10     | 10  | 10     | 10   | 8        | 7   | 7   |
|                       | <LOQ   | 0     | 3      | 8   | 8      | 9    | 8        | 7   | 7   |

Table S2: Results (p-values) for statistical analysis of log<sub>10</sub> reduction comparison of the different treatments with oneway-ANOVA followed by Tukey post hoc test or Kruskal-Wallis followed by Dunn-Bonferoni post hoc test, respectively. Significant differences (p<0.05) are marked in grey.

| Parameter        | <i>E. coli</i>                     | Enterococci    | <i>C. perfringens</i> | Somatic coliphages | <i>P. aeruginosa</i> | ICC          | TCC          | 16S rRNA     | <i>int1</i>  | <i>su1</i>   | ESBL <i>E. coli</i> | VRE            | ESBL KEC       |
|------------------|------------------------------------|----------------|-----------------------|--------------------|----------------------|--------------|--------------|--------------|--------------|--------------|---------------------|----------------|----------------|
| Statistical Test | Kruskal-Wallis                     | Kruskal-Wallis | oneway-ANOVA          | oneway-ANOVA       | oneway-ANOVA         | oneway-ANOVA | oneway-ANOVA | oneway-ANOVA | oneway-ANOVA | oneway-ANOVA | Kruskal-Wallis      | Kruskal-Wallis | Kruskal-Wallis |
| Comparison       | p-values<br>(<0.05 marked in grey) |                |                       |                    |                      |              |              |              |              |              |                     |                |                |
| O3 – O3.BAC      | 1.00E+00                           | 6.70E-03       | 5.65E-06              | 3.42E-14           | 7.49E-01             | 2.47E-09     | 1.00E+00     | 6.11E-02     | 8.38E-03     | 2.80E-01     | 1.00E+00            | 1.00E+00       | 1.00E+00       |
| O3 – O3.cS.BAC   | 3.26E-01                           | 3.44E-06       | 6.45E-14              | <1.00E-14          | 1.45E-02             | 5.23E-07     | 9.80E-03     | 1.28E-06     | 1.01E-06     | 4.29E-03     | 4.92E-01            | 1.00E+00       | 1.00E+00       |
| O3 – O3.cS.A     | 1.21E-01                           | 5.13E-05       | 9.14E-14              | <1.00E-14          | 2.59E-01             | 3.15E-06     | 2.43E-03     | 9.61E-06     | 8.01E-07     | 3.39E-03     | 6.15E-01            | 1.00E+00       | 1.00E+00       |
| O3 – O3.cS.A.GAC | 1.80E-04                           | 2.21E-06       | 8.69E-14              | <1.00E-14          | 2.86E-02             | 7.70E-09     | 2.40E-03     | 3.23E-11     | 4.87E-08     | 1.48E-04     | 3.35E-01            | 1.00E+00       | 1.00E+00       |
| O3 – O3.CW1      | 7.28E-03                           | 9.14E-03       | 4.12E-14              | <1.00E-14          |                      | 2.21E-09     | 6.82E-04     | 4.98E-11     | 1.09E-10     | 8.65E-07     | 1.62E-01            | 1.00E+00       | 1.00E+00       |
| O3 – O3.CW2      | 3.60E-02                           | 4.84E-02       | 9.07E-14              | <1.00E-14          |                      | <1.00E-14    | 9.47E-01     | 3.23E-07     | 3.11E-07     | 6.16E-05     | 1.12E-01            | 1.00E+00       | 1.00E+00       |

| Parameter            | <i>E. coli</i>                     | Enterococci    | <i>C. perfringens</i> | Somatic coliphages | <i>P. aeruginosa</i> | ICC          | TCC          | 16S rRNA     | <i>intf1</i> | <i>su1</i>   | ESBL <i>E. coli</i> | VRE            | ESBL KEC       |
|----------------------|------------------------------------|----------------|-----------------------|--------------------|----------------------|--------------|--------------|--------------|--------------|--------------|---------------------|----------------|----------------|
| Statistical Test     | Kruskal-Wallis                     | Kruskal-Wallis | oneway-ANOVA          | oneway-ANOVA       | oneway-ANOVA         | oneway-ANOVA | oneway-ANOVA | oneway-ANOVA | oneway-ANOVA | oneway-ANOVA | Kruskal-Wallis      | Kruskal-Wallis | Kruskal-Wallis |
| Comparison           | p-values<br>(<0.05 marked in grey) |                |                       |                    |                      |              |              |              |              |              |                     |                |                |
| O3.BAC – O3.cS.BAC   | 1.13E-01                           | 1.00E+00       | 1.76E-06              | 4.79E-01           | 8.31E-01             | 7.63E-01     | 1.82E-02     | 3.16E-02     | 1.54E-01     | 6.49E-01     | 1.00E+00            | 1.00E+00       | 1.00E+00       |
| O3.BAC – O3.cS.A     | 4.23E-02                           | 1.00E+00       | 5.87E-05              | 7.48E-01           | 1.00E+00             | 4.52E-01     | 4.77E-03     | 1.18E-01     | 1.35E-01     | 6.01E-01     | 1.00E+00            | 1.00E+00       | 1.00E+00       |
| O3.BAC – O3.cS.A.GAC | 8.88E-05                           | 1.00E+00       | 1.97E-05              | 2.31E-01           | 9.03E-01             | 1.00E+00     | 4.62E-03     | 8.27E-07     | 1.20E-02     | 9.60E-02     | 1.00E+00            | 1.00E+00       | 1.00E+00       |
| O3.BAC – O3.CW1      | 2.63E-03                           | 1.00E+00       | 1.79E-11              | 1.25E-03           |                      | 9.98E-01     | 1.32E-03     | 1.66E-06     | 5.45E-05     | 1.86E-03     | 1.00E+00            | 1.00E+00       | 1.00E+00       |
| O3.BAC – O3.CW2      | 1.30E-02                           | 1.00E+00       | 1.70E-06              | 1.88E-02           |                      | 1.64E-04     | 8.79E-01     | 9.04E-03     | 6.05E-02     | 6.31E-02     | 1.00E+00            | 1.00E+00       | 1.00E+00       |
| O3.cS.BAC – O3.cS.A  | 1.00E+00                           | 1.00E+00       | 9.82E-01              | 1.00E+00           | 7.35E-01             | 9.99E-01     | 9.99E-01     | 9.98E-01     | 1.00E+00     | 1.00E+00     | 1.00E+00            | 1.00E+00       | 1.00E+00       |
| O3.cS.BAC –          | 7.68E-01                           | 1.00E+00       | 1.00E+00              | 9.99E-01           | 9.99E-01             | 8.25E-01     | 9.97E-01     | 2.80E-02     | 9.10E-01     | 8.80E-01     | 1.00E+00            | 1.00E+00       | 1.00E+00       |

| Parameter             | <i>E. coli</i>                     | Enterococci    | <i>C. perfringens</i> | Somatic coliphages | <i>P. aeruginosa</i> | ICC          | TCC          | 16S rRNA     | <i>intf1</i> | <i>su1</i>   | ESBL <i>E. coli</i> | VRE            | ESBL KEC       |
|-----------------------|------------------------------------|----------------|-----------------------|--------------------|----------------------|--------------|--------------|--------------|--------------|--------------|---------------------|----------------|----------------|
| Statistical Test      | Kruskal-Wallis                     | Kruskal-Wallis | oneway-ANOVA          | oneway-ANOVA       | oneway-ANOVA         | oneway-ANOVA | oneway-ANOVA | oneway-ANOVA | oneway-ANOVA | oneway-ANOVA | Kruskal-Wallis      | Kruskal-Wallis | Kruskal-Wallis |
| Comparison            | p-values<br>(<0.05 marked in grey) |                |                       |                    |                      |              |              |              |              |              |                     |                |                |
| O3.cS.A.GAC           |                                    |                |                       |                    |                      |              |              |              |              |              |                     |                |                |
| O3.cS.BAC – O3.CW1    | 1.00E+00                           | 1.00E+00       | 2.80E-02              | 1.54E-01           |                      | 4.77E-01     | 9.28E-01     | 4.56E-02     | 9.91E-02     | 1.40E-01     | 1.00E+00            | 1.00E+00       | 1.00E+00       |
| O3.cS.BAC – O3.CW2    | 1.00E+00                           | 1.00E+00       | 9.82E-01              | 5.97E-01           |                      | 1.04E-06     | 5.67E-04     | 9.98E-01     | 9.99E-01     | 8.24E-01     | 1.00E+00            | 1.00E+00       | 1.00E+00       |
| O3.cS.A – O3.cS.A.GAC | 1.00E+00                           | 1.00E+00       | 1.00E+00              | 9.68E-01           | 8.62E-01             | 5.36E-01     | 1.00E+00     | 6.50E-03     | 9.28E-01     | 9.07E-01     | 1.00E+00            | 1.00E+00       | 1.00E+00       |
| O3.cS.A – O3.CW1      | 1.00E+00                           | 1.00E+00       | 2.93E-03              | 6.46E-02           |                      | 2.27E-01     | 9.94E-01     | 1.13E-02     | 1.13E-01     | 1.62E-01     | 1.00E+00            | 1.00E+00       | 1.00E+00       |
| O3.S.A – O3.CW2       | 1.00E+00                           | 1.00E+00       | 7.27E-01              | 3.64E-01           |                      | 1.81E-07     | 1.26E-04     | 9.40E-01     | 1.00E+00     | 8.58E-01     | 1.00E+00            | 1.00E+00       | 1.00E+00       |
| O3.cS.A.GAC – O3.CW1  | 1.00E+00                           | 1.00E+00       | 1.21E-02              | 4.00E-01           |                      | 9.96E-01     | 9.98E-01     | 1.00E+00     | 7.20E-01     | 8.41E-01     | 1.00E+00            | 1.00E+00       | 1.00E+00       |

| Parameter            | <i>E. coli</i>                     | Enterococci    | <i>C. perfringens</i> | Somatic coliphages | <i>P. aeruginosa</i> | ICC          | TCC          | 16S rRNA     | <i>intf1</i> | <i>su1</i>   | ESBL <i>E. coli</i> | VRE            | ESBL KEC       |
|----------------------|------------------------------------|----------------|-----------------------|--------------------|----------------------|--------------|--------------|--------------|--------------|--------------|---------------------|----------------|----------------|
| Statistical Test     | Kruskal-Wallis                     | Kruskal-Wallis | oneway-ANOVA          | oneway-ANOVA       | oneway-ANOVA         | oneway-ANOVA | oneway-ANOVA | oneway-ANOVA | oneway-ANOVA | oneway-ANOVA | Kruskal-Wallis      | Kruskal-Wallis | Kruskal-Wallis |
| Comparison           | p-values<br>(<0.05 marked in grey) |                |                       |                    |                      |              |              |              |              |              |                     |                |                |
| O3.cS.A.GAC – O3.CW2 | 1.00E+00                           | 1.00E+00       | 9.10E-01              | 8.75E-01           |                      | 2.07E-04     | 1.34E-04     | 1.17E-01     | 9.94E-01     | 1.00E+00     | 1.00E+00            | 1.00E+00       | 1.00E+00       |
| O3.CW1 – O3.CW2      | 1.00E+00                           | 1.00E+00       | 3.48E-01              | 9.91E-01           |                      | 2.57E-03     | 3.89E-05     | 1.72E-01     | 2.83E-01     | 8.60E-01     | 1.00E+00            | 1.00E+00       | 1.00E+00       |



Table S3: Results (p-values) for Kruskal-Wallis followed by Dunn-Bonferoni post hoc test on relative abundances *int1/16S* rRNA and *su1/16S* rRNA in the effluents of the investigated treatments. Significant differences (p<0.05) are marked in grey.

| Parameter         | <i>int1/16S</i> rRNA               | <i>su1/16S</i> rRNA |
|-------------------|------------------------------------|---------------------|
| Statistical Test  | Kruskal-Wallis                     | Kruskal-Wallis      |
| Comparison        | p-values<br>(<0.05 marked in grey) |                     |
| BAC - CW1         | 1                                  | 1                   |
| BAC - CW2         | 1                                  | 1                   |
| CW1 - CW2         | 1                                  | 1                   |
| BAC - O3_eff      | 1                                  | 1                   |
| CW1 - O3_eff      | 1                                  | 1                   |
| CW2 - O3_eff      | 1                                  | 1                   |
| BAC - O3_in       | 1                                  | 0.3156              |
| CW1 - O3_in       | 0.3871                             | 0.0289              |
| CW2 - O3_in       | 0.8232                             | 0.0158              |
| O3_eff - O3_in    | 1                                  | 1                   |
| BAC - cS.A        | 1                                  | 1                   |
| CW1 - cS.A        | 1                                  | 1                   |
| CW2 - cS.A        | 1                                  | 1                   |
| O3_eff - cS.A     | 1                                  | 1                   |
| O3_in - cS.A      | 0.3249                             | 0.1103              |
| BAC - cS.A.GAC    | 1                                  | 1                   |
| CW1 - cS.A.GAC    | 0.8568                             | 1                   |
| CW2 - cS.A.GAC    | 1                                  | 1                   |
| O3_eff - cS.A.GAC | 1                                  | 1                   |
| O3_in - cS.A.GAC  | 1                                  | 1                   |

| Parameter         | <i>int1</i> /16S rRNA              | <i>su1</i> /16S rRNA |
|-------------------|------------------------------------|----------------------|
| Statistical Test  | Kruskal-Wallis                     | Kruskal-Wallis       |
| Comparison        | p-values<br>(<0.05 marked in grey) |                      |
| cS.A - cS.A.GAC   | 0.7846                             | 1                    |
| BAC - cS.BAC      | 1                                  | 1                    |
| CW1 - cS.BAC      | 1                                  | 1                    |
| CW2 - cS.BAC      | 1                                  | 1                    |
| O3_eff - cS.BAC   | 1                                  | 1                    |
| O3_in - cS.BAC    | 1                                  | 0.4844               |
| cS.A - cS.BAC     | 1                                  | 1                    |
| cS.A.GAC - cS.BAC | 1                                  | 1                    |
